# Supplementary material for: Assessing CYP2C8-Mediated Pharmaceutical Excipient-Drug Interaction Potential: A Case Study of Tween 80 and Cremophor EL−35
Source: MDPI journal article supplement (doi:10.3390/pharmaceutics13091492), 2021-09-17
Supplement: s1 [file s1]

# Supplementary materials: Assessing CYP2C8-Mediated Pharmaceutical Excipient-Drug Interaction Potential: A Case Study of Tween 80 and Cremophor EL-35

Chengming Wen, Haoyang Hu, Wenwen Zhang, Xin Liu, Xuehua Jiang and Ling Wang

## 1. Tables

**Table S1.** Summary of HPLC-MS/MS conditions used in sample analysis.

| Analyte               | Analytical column                    | Mobile phase                                    | Gradient pattern<br>% B/time (min) | Mass transition<br>m/z<br>Q1–Q3 | Collision energy<br>(V) |
|-----------------------|--------------------------------------|-------------------------------------------------|------------------------------------|---------------------------------|-------------------------|
| Paclitaxel            | CAPCELL PAK C18, 50<br>× 2.00 mm 5um | A:0.2% formic acid in water;<br>B: acetonitrile | 20/0-1,                            | 854.2-285.9                     | 23.2                    |
| 6α-Hydroxy paclitaxel |                                      |                                                 | 20-95/1-2, 95/2-3,<br>20/3-4       | 870.8-286.1                     | 26.7                    |

**Table 2.** Oligonucleotides used in this study.

| Oligo name | Source | Forward (5' to 3')      | Reverse (5' to 3')          | Genebank accession number |
|------------|--------|-------------------------|-----------------------------|---------------------------|
| CYP2C8     | human  | GGCCACTTTCTAGATAAGAATG  | TGATAGCAGATCGGCAGCCA        | NM_000770.3               |
| CYP3A4     | human  | GCAGGAGGAAATTGATGCAGTT  | GTCAAGATACTCCATCTGTAGCACAGT | NM_017460.6               |
| GAPDH      | human  | GTCAACGGATTTGGTCGTATTG  | TGTAGTTGAGGTCAATGAAGGG      | NM_002046.7               |
| Cyp2c6     | rats   | TCAGCAGGAAAACGGATGTG    | AATCGTGGTCAGGAATAAAAATAACTC | NM_001013904.2            |
| Cyp2c11    | rats   | CCCTGAGGACTTTTGGGATGGGC | GGGGCACCTTTTGCTCTTCCTC      | NM_019184.2               |
| Cyp2c22    | rats   | GGCCACTTTCTAGATAAGAATG  | TGATAGCAGATCGGCAGCCA        | NM_138512.2               |
| Cyp3a1     | rats   | CCATCACGGACACAGAAATG    | CTTTCCCCATAATCCCCACT        | NM_013105.2               |
| Cyp3a2     | rats   | AGTGGGGATTATGGGGAAAG    | CAATGATGGGGAACATCTCC        | NM_153312.3               |
| Gapdh      | rats   | GGCACAGTCAAGGCTGAGAATG  | ATGGTGGTGAAGACGCCAGTA       | NM_017008.4               |

## 2. Figures

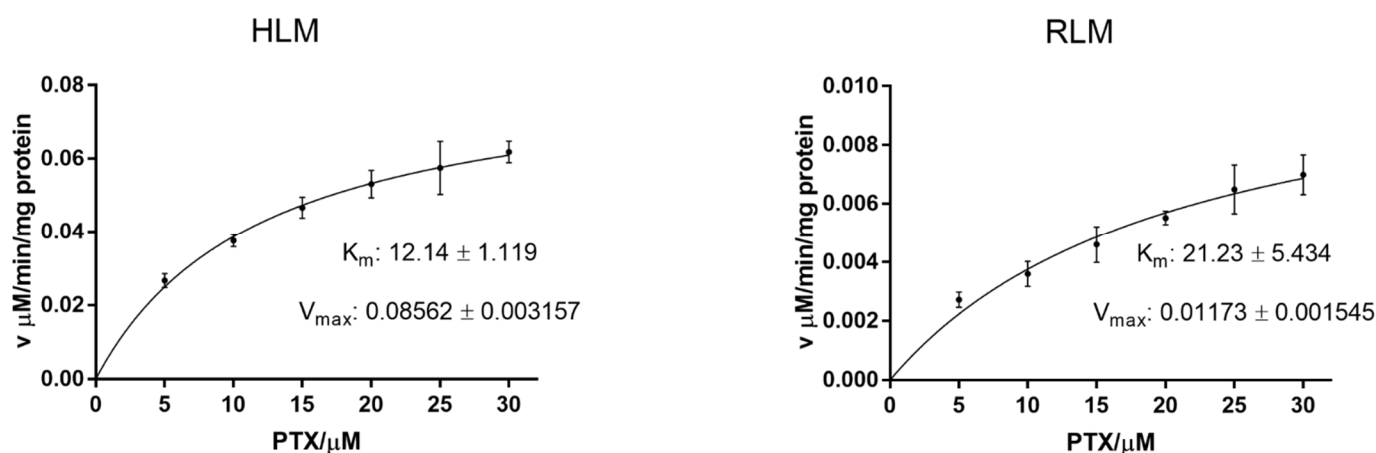

**Figure S1.** Kinetic plots for 6α'-hydroxytaxol formation velocity versus substrate concentration in HLM and RLM. Each data point represents the mean of triplicate. The lines represent the best fit to the data using nonlinear regression.

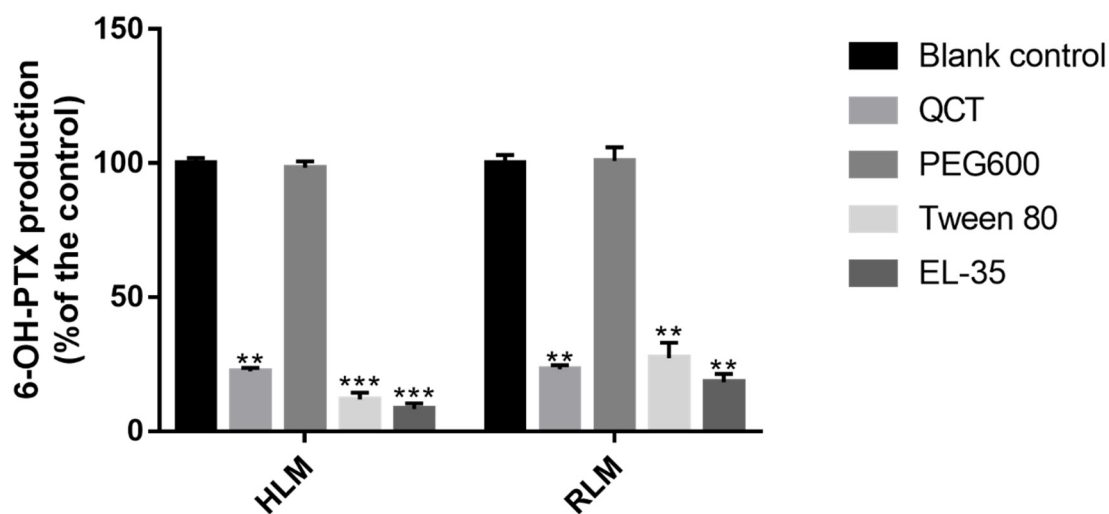

**Figure S2.** Effects of various PEs on 6 $\alpha$ '-hydroxylation of PTX in HLM and RLM. PTX concentrations were 10  $\mu$ M and 20 $\mu$ M for HLM and RLM, respectively. QCT (10 $\mu$ M) was served as the positive control. Each data point represents the mean of triplicate. \*\* $p < 0.01$ ; \*\*\* $p < 0.001$  compared with blank control.

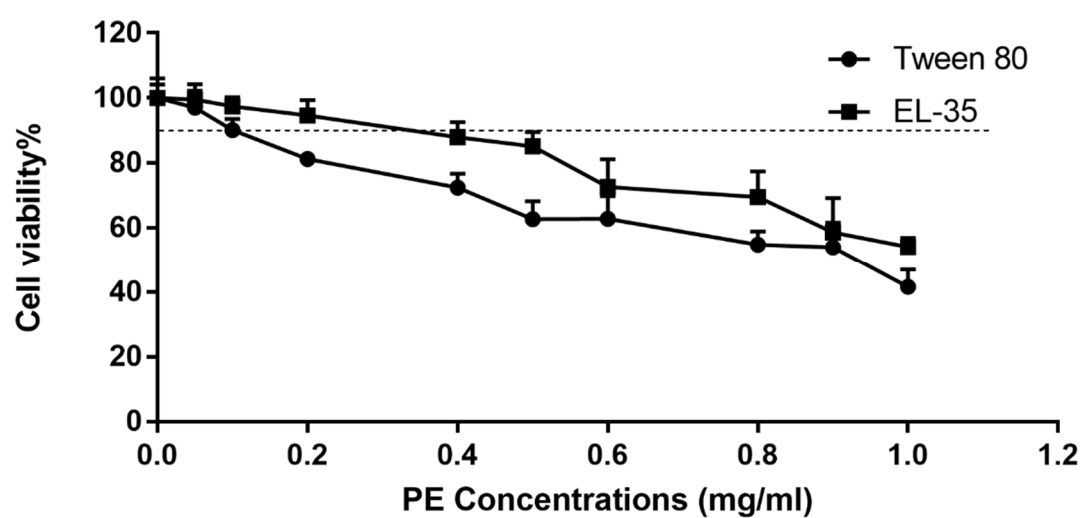

**Figure S3.** Cell viability rates calculated by MTT assay. HepG2 cells were treated with the indicated concentrations of Tween 80 and EL-35 for 24 h, respectively. Data were expressed as the mean  $\pm$  S.D. ( $n=3$  replicates/treatment).

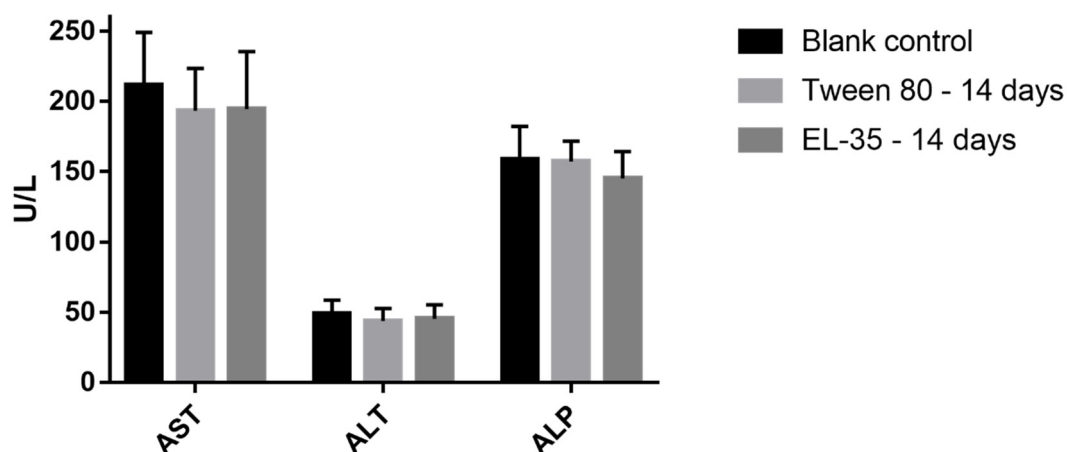

**Figure S4.** Effects of Tween 80 and EL-35 on the rats' liver function after multiple doses. The main serum indexes (AST/ALT/ALP) of liver function in Wistar rats were determined after multiple administration of PEs (Tween 80, EL-35) for 14 days. Data were expressed as the mean  $\pm$  S.D. (n=6 replicates/treatment).

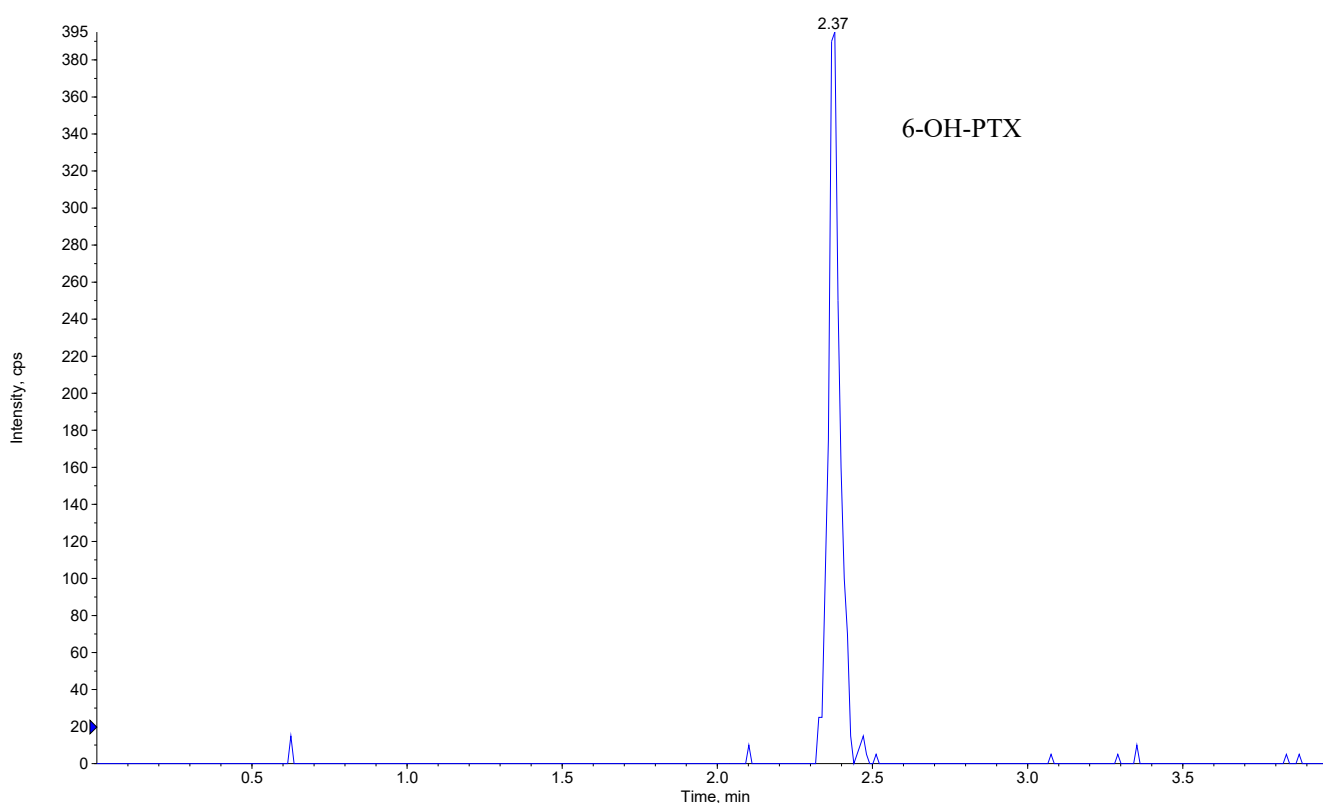

**Figure S5.** LCMS chromatogram for 6-OH-PTX in metabolism incubation system (4 nM, the Lower Limit of Quantification).

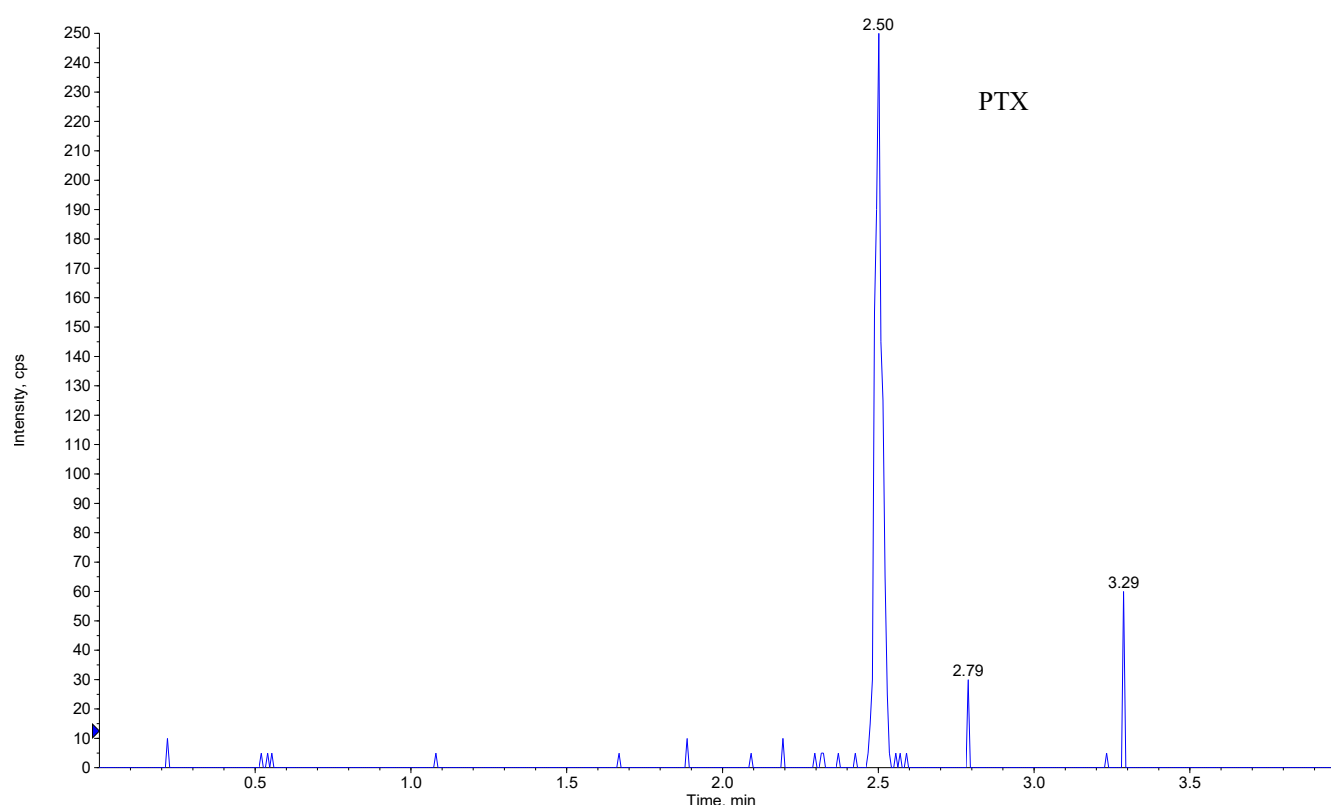

Figure S6. LCMS chromatogram for PTX in rat plasma (10 ng/mL, the Lower Limit of Quantification).

### 3. Estimation of EL-35 exposure in human:

Information from the label of Taxol:

1. Each mL of solution contains 6 mg PTX and 527 mg EL-35. (That is, 527 mg EL-35/6 mg PTX)

2. Taxol administration:

a. administrated intravenously over 3 hours at a dose of 175 mg/m<sup>2</sup>

b. administrated intravenously over 24 hours at a dose of 135 mg/m<sup>2</sup>

Here, we are assuming a female ovarian cancer patient who weighs 57.3 kg and is 155.8 cm tall (according to the average body weight and height of Chinese women reported by National Health Commission of China (2020)), so that her body surface area (BSA) should be 1.56 m<sup>2</sup>. The dosing regimen she may receive is 273.0 mg PTX (i.v. > 3 hours) or 210.6 mg PTX (i.v. > 24 hours) according to Equation 1. So that, the patient's exposure level of EL-35 in the body under the two regimens is **418.5 mg/kg** (i.v. > 3 hours) or **322.8 mg/kg** (i.v. > 24 hours) according to Equation 2.

$$BSA \times D1 \quad (\text{Equation 1})$$

D1 in Equation 1 is the dose of 175 mg/m<sup>2</sup> or 135 mg/m<sup>2</sup>.

$$\frac{D2 \times 527\text{mg}}{6\text{mg} \times W_{\text{human}}} \quad (\text{Equation 2})$$

D2 in Equation 2 represents the dosage calculated by Equation 1 (273.0 mg or 210.6 mg);  $W_{\text{human}}$  represents the average body weight of Chinese women (57.3 kg).

The EL-35 dose set in this study (430 mg/kg) equivalent to **71.5 mg/kg** in human according to Equation 3.

$$D3 \times \left( \frac{\overline{W}_{\text{rat}}}{W_{\text{human}}} \right)^{0.33} \quad (\text{Equation 3})$$

In Equation 3, D3 represents the EL-35 dose set in this study (430 mg/kg);  $\overline{W}_{\text{rat}}$  represents the average weight of rats in this study (about 250 g);  $W_{\text{human}}$  represents the average body weight of Chinese women (57.3 kg).

---

(The equivalent dose conversion is based on FDA Guidance for Industry *Estimating the Maximum Safe Starting Dose in Initial Clinical Trials for Therapeutics in Adult Healthy Volunteers*. <https://www.fda.gov/regulatory-information/search-fda-guidance-documents/estimating-maximum-safe-starting-dose-initial-clinical-trials-therapeutics-adult-healthy-volunteers>)

The estimated exposure of EL-35 in human is about 4.5~5.9 times of the dose we set in this study.
